# Supplementary figures and images for: Interactions between dendritic cells and CD4+ T cells during Plasmodium infection
Source: Springer Nature journal article supplement (doi:10.1186/1475-2875-7-88), 2008-05-21

### FACs analysis for figure 4F

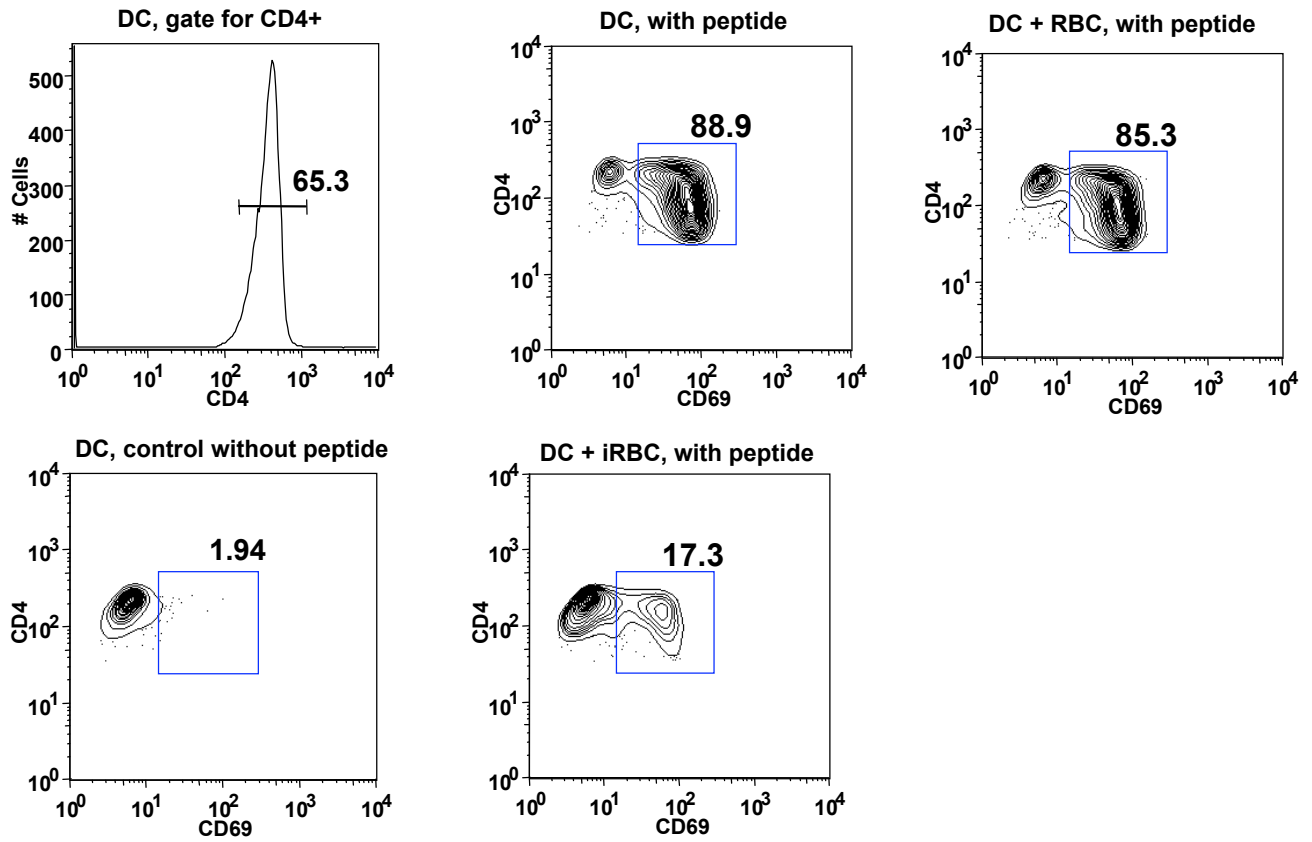

### FACs analysis for figure 4G

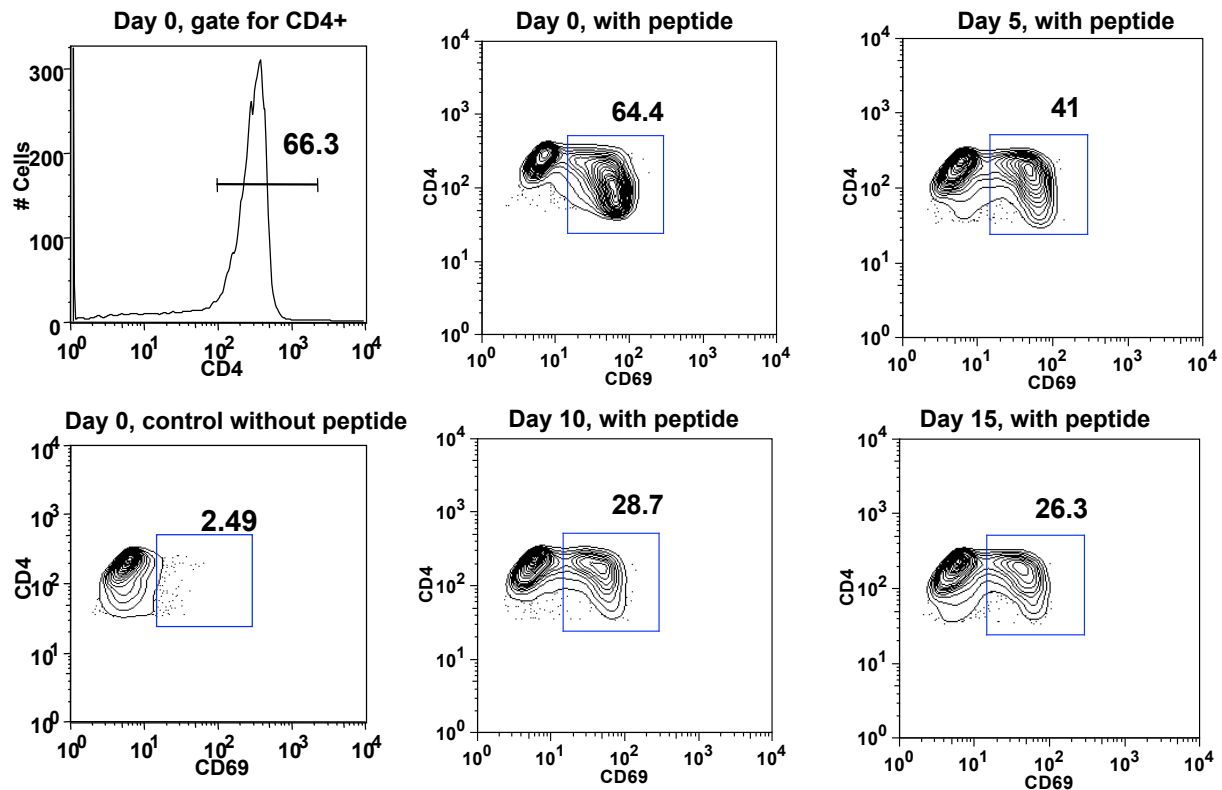

Supplement: Additional file 3 [file 1475-2875-7-88-s3.pdf]

## FACs analysis of transferred cells from figure 5

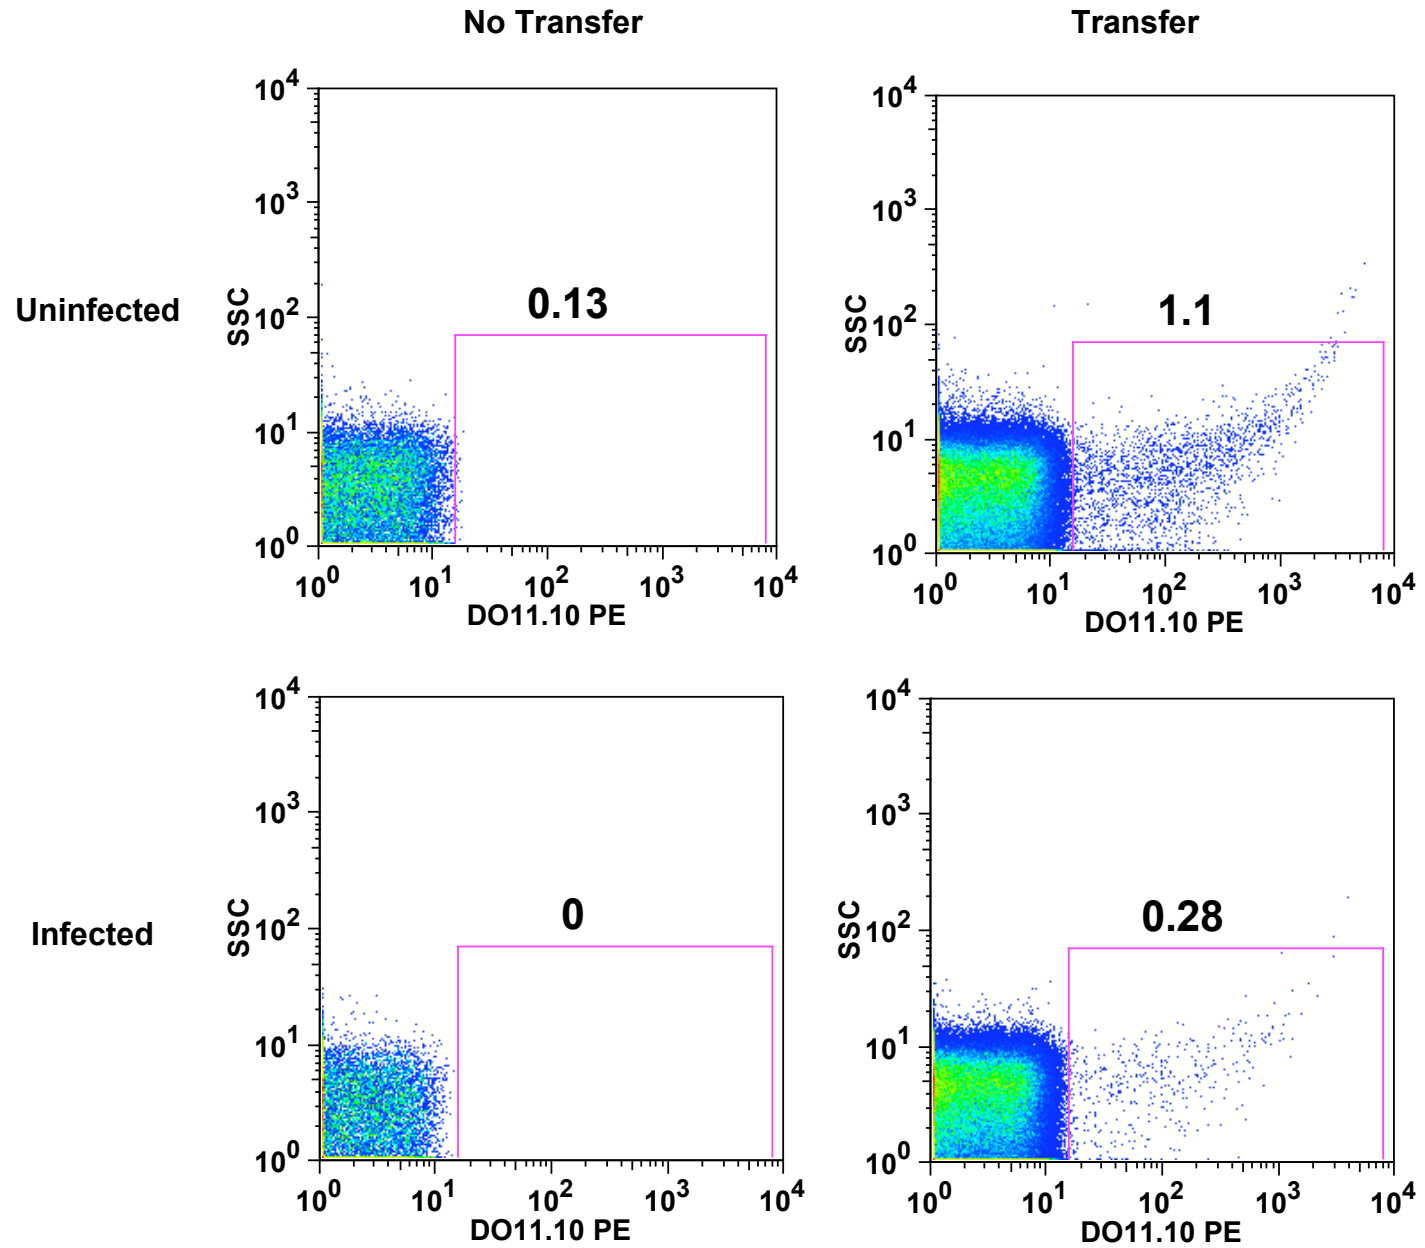

Supplement: Additional file 4 [file 1475-2875-7-88-s4.pdf]
